# Supplementary material for: M-GCAT: interactively and efficiently constructing large-scale multiple genome comparison frameworks in closely related species
Source: Springer Nature journal article supplement (doi:10.1186/1471-2105-7-433), 2006-10-05
Supplement: 12859_2006_1172_MOESM2_ESM.pdf [file 12859_2006_1172_MOESM2_ESM.pdf]

| #                                  | Sequence Name                                                                                      | NCBI Accession |
|------------------------------------|----------------------------------------------------------------------------------------------------|----------------|
| 1                                  | <i>Mycoplasma pneumoniae</i>                                                                       | NC_000912.1    |
|                                    | <i>Mycoplasma genitalium</i>                                                                       | NC_000908.1    |
| 2                                  | <i>Pyrococcus horikoshi</i>                                                                        | NC_000961.1    |
|                                    | <i>Pyrococcus abyssi</i>                                                                           | NC_000868.1    |
| 3                                  | <i>Salmonella enterica</i> subsp. <i>enterica</i> serovar <i>Typhi</i> str. <i>CT18</i>            | NC_003198.1    |
|                                    | <i>Salmonella enterica</i> subsp. <i>enterica</i> serovar <i>Typhi</i> Ty2                         | NC_004631.1    |
| 4                                  | <i>Listeria monocytogenes</i> str. 4b F2365                                                        | NC_002973.6    |
|                                    | <i>Listeria innocua</i> Clip11262                                                                  | NC_003212.1    |
|                                    | <i>Listeria monocytogenes</i> EGD-e                                                                | NC_003210.1    |
| 5                                  | <i>Xanthomonas campestris</i> pv. <i>campestris</i> str. <i>ATCC 33913</i>                         | NC_003902.1    |
|                                    | <i>Xanthomonas campestris</i> pv. <i>campestris</i> str. <i>8004</i>                               | NC_007086.1    |
|                                    | <i>Xanthomonas campestris</i> pv. <i>vesicatoria</i> str. <i>85-10</i>                             | NC_007508.1    |
| 6                                  | <i>Pseudomonas syringae</i> pv. <i>phaseolicola</i> 1448A                                          | NC_005773.3    |
|                                    | <i>Pseudomonas syringae</i> pv. <i>tomato</i> str. <i>DC3000</i>                                   | NC_004578.1    |
|                                    | <i>Pseudomonas syringae</i> pv. <i>syringae</i> B728a                                              | NC_007005.1    |
| 7                                  | <i>Chlamydomphila pneumoniae</i> AR39                                                              | NC_002179.2    |
|                                    | <i>Chlamydomphila pneumoniae</i> CWL029                                                            | NC_000922.1    |
|                                    | <i>Chlamydomphila pneumoniae</i> J138                                                              | NC_002491.1    |
|                                    | <i>Chlamydomphila pneumoniae</i> TW-183                                                            | NC_005043.1    |
| 8                                  | <i>Yersinia pestis</i> biovar <i>Medievalis</i> str. <i>91001</i>                                  | NC_005810.1    |
|                                    | <i>Yersinia pestis</i> CO92                                                                        | NC_003143.1    |
|                                    | <i>Yersinia pestis</i> KIM                                                                         | NC_004088.1    |
|                                    | <i>Yersinia pseudotuberculosis</i> IP 32953                                                        | NC_006155.1    |
| 9                                  | <i>Shigella sonnei</i> Ss046                                                                       | NC_007384.1    |
|                                    | <i>Shigella boydii</i> Sb227                                                                       | NC_007613.1    |
|                                    | <i>Shigella dysenteriae</i> 197                                                                    | NC_007606.1    |
|                                    | <i>Shigella flexneri</i> 2a str. 2457T                                                             | NC_004741.1    |
|                                    | <i>Shigella flexneri</i> 2a str. 301                                                               | NC_004337.1    |
| 10                                 | <i>Salmonella typhimurium</i> LT2                                                                  | NC_003197.1    |
|                                    | <i>Salmonella enterica</i> subsp. <i>enterica</i> serovar <i>Choleraesuis</i> str. <i>SC-B67</i>   | NC_006905.1    |
|                                    | <i>Salmonella enterica</i> subsp. <i>enterica</i> serovar <i>Paratyphi A</i> str. <i>ATCC 9150</i> | NC_006511.1    |
|                                    | <i>Salmonella enterica</i> subsp. <i>enterica</i> serovar <i>Typhi</i> str. <i>CT18</i>            | NC_003198.1    |
|                                    | <i>Salmonella enterica</i> subsp. <i>enterica</i> serovar <i>Typhi</i> Ty2                         | NC_004631.1    |
| 11                                 | <i>Escherichia coli</i> W3110 DNA                                                                  | AC_000091.1    |
|                                    | <i>Escherichia coli</i> O157:H7                                                                    | NC_002695.1    |
|                                    | <i>Escherichia coli</i> CFT073                                                                     | NC_004431.1    |
|                                    | <i>Escherichia coli</i> K12                                                                        | NC_000913.2    |
|                                    | <i>Escherichia coli</i> O157:H7 EDL933                                                             | NC_002655.1    |
| 12                                 | <i>Streptococcus pyogenes</i> SSI-1                                                                | NC_004606.1    |
|                                    | <i>Streptococcus pyogenes</i> M1 GAS                                                               | NC_002737.1    |
|                                    | <i>Streptococcus pyogenes</i> MGAS315                                                              | NC_004070.1    |
|                                    | <i>Streptococcus pyogenes</i> MGAS5005                                                             | NC_007297.1    |
|                                    | <i>Streptococcus pyogenes</i> MGAS6180                                                             | NC_007296.1    |
|                                    | <i>Streptococcus pyogenes</i> MGAS8232                                                             | NC_003485.1    |
| 13                                 | <i>Streptococcus pyogenes</i> MGAS10394                                                            | NC_006086.1    |
|                                    | <i>Staphylococcus aureus</i> subsp. <i>aureus</i> USA300                                           | NC_007793.1    |
|                                    | <i>Staphylococcus aureus</i> subsp. <i>aureus</i> COL                                              | NC_002951.2    |
|                                    | <i>Staphylococcus aureus</i> subsp. <i>aureus</i> Mu50                                             | NC_002758.2    |
|                                    | <i>Staphylococcus aureus</i> subsp. <i>aureus</i> MW2                                              | NC_003923.1    |
|                                    | <i>Staphylococcus aureus</i> subsp. <i>aureus</i> N315                                             | NC_007795.1    |
|                                    | <i>Staphylococcus aureus</i> subsp. <i>aureus</i> NCTC 8325                                        | NC_007622.1    |
| <i>Staphylococcus aureus</i> RF122 | NC_006155.1                                                                                        |                |
| 14                                 | <i>Bacillus anthracis</i> str. 'Ames Ancestor'                                                     | NC_007530.2    |
|                                    | <i>Bacillus anthracis</i> str. <i>Ames</i>                                                         | NC_003997.3    |
|                                    | <i>Bacillus anthracis</i> str. <i>Sterne</i>                                                       | NC_005945.1    |
|                                    | <i>Bacillus cereus</i> ATCC 14579                                                                  | NC_004722.1    |
|                                    | <i>Bacillus cereus</i> ATCC 10987                                                                  | NC_003909.8    |
|                                    | <i>Bacillus cereus</i> ZK                                                                          | NC_006274.1    |
|                                    | <i>Bacillus thuringiensis</i> serovar <i>konkukian</i> str. <i>97-27</i>                           | NC_005957.1    |
